# Supplementary material for: Mass Spectrometry Based Proteomic Analysis of Salivary Glands of Urban Malaria VectorAnopheles stephensi
Source: Hindawi journal article supplement (doi:10.1155/2014/686319), 2014-01-01
Supplement: f1 [file 686319.f1.pdf]

**Supplementary Table 1: A catalogue of known proteins identified by using in-gel digestion strategy and LC/MS/MS using MASCOT algorithm**

| S.no | Accession number/vector base Accession number | Protein                                           | Mol. Weight | Peptides | Calculated pI | Sequence coverage | Domain/Function                                                |
|------|-----------------------------------------------|---------------------------------------------------|-------------|----------|---------------|-------------------|----------------------------------------------------------------|
| 1    | ASTM005454-PA                                 | Tropomyosin 2                                     | 30832       | 5        | 4.82          | 17%               | No conserved domain                                            |
| 2    | ASTM006933-PA                                 | Myosin heavy chain                                | 135972      | 5        | 5.2           | 4%                | Motor activity                                                 |
| 3    | ASTM007096-PA                                 | sulfate transporter protein                       | 88306       | 2        | 9.27          | 2%                | Transport                                                      |
| 4    | ASTM014183-PA                                 | Hypothetical protein/ATP synthase alpha subunit   | 80465       | 2        | 9.81          | 2%                | ATPase enzyme                                                  |
| 5    | GI: 339649279                                 | Glutathione S-Transferase E4                      | 25076       | 1        | 6.53          | 5%                | No conserved domain                                            |
| 6    | ASTM000527-PA                                 | Hypothetical protein                              | 66553       | 1        | 8.09          | 1%                | uncharacterized                                                |
| 7    | ASTM017293-PA                                 | Porin (voltage dependent anion selective channel) | 42907       | 1        | 9.12          | 1%                | Anion transport                                                |
| 8    | ASTM005798-PA                                 | elongation factor1 alpha 1                        | 59939       | 1        | 8.71          | 1%                | GTP binding                                                    |
| 9    | ASTM010693-PA                                 | short chain dehydrogenase                         | 27502       | 2        | 7             | 8%                | oxidoreductase function                                        |
| 10   | ASTM014983-PA                                 | Histone H2A                                       | 13355       | 2        | 10.72         | 11%               | nucleosome assembly/DNA binding                                |
| 11   | ASTM009772-PA                                 | Actin                                             | 41852       | 2        | 5.36          | 7%                | Actin protein HSP70/ATP binding                                |
| 12   | ASTM015472-PA                                 | Hypothetical protein                              | 21893       | 1        | 8.29          | 10%               | Uncharacterized                                                |
| 13   | ASTM005771-PA                                 | Peptide N-glycanase                               | 85828       | 2        | 8.77          | 1%                | signal transduction                                            |
| 14   | ASTM009670-PA                                 | Prefoldin subunit                                 | 18939       | 1        | 5.66          | 4%                | [Posttranslational modification, protein turnover, chaperones] |

|    |               |                                                      |        |   |      |     |                                           |
|----|---------------|------------------------------------------------------|--------|---|------|-----|-------------------------------------------|
| 15 | ASTM017244-PA | JmjC domain-containing histone demethylation protein | 48571  | 1 | 9.07 | 2%  | protein binding                           |
| 16 | ASTM000815-PA | Hypothetical protein                                 | 181818 | 2 | 8.47 | 1%  | Signal transduction                       |
| 17 | ASTM001058-PA | Hypothetical protein (Rho effector protein)          | 15505  | 1 | 9.16 | 5%  | Signal transduction                       |
| 18 | GI:373880220  | Calreticulin                                         | 46514  | 2 | 4.37 | 2%  | Unfolded protein binding                  |
| 19 | ASTM007078-PA | Axonemal dynein light chain                          | 28779  | 1 | 5.5  | 2%  | Motility                                  |
| 20 | ASTM017761-PA | Type -2 keratin                                      | 56560  | 2 | 7    | 3%  | Cell division and chromosome partitioning |
| 21 | ASTM012154-PA | Hypothetical protein                                 | 7046   | 1 | 6.9  | 11% | Uncharacterized                           |
| 22 | GI:380865625  | BZIP1 OS                                             | 41596  | 3 | 8.85 | 4%  | DNA binding                               |
| 23 | GI:66863200   | Putative reverse transcriptase (Fragment)            | 13461  | 1 | 9.93 | 4%  | RNA-directed DNA polymerase activity      |

**Supplementary Table 2: A catalogue of novel proteins identified by using in-gel digestion strategy and LC/MS/MS using OMSSA algorithm**

| S.no | Accession    | Features                                                                  | MW      | % Seq Coverage | E value  | Domain                                                              |
|------|--------------|---------------------------------------------------------------------------|---------|----------------|----------|---------------------------------------------------------------------|
| 1    | gil3617768   | nitric oxide synthase [similar to <i>Anopheles gambiae</i> ]              | 2321.1  | 14%            | 0.04     | Ferrous reductase transfer                                          |
| 2    | gil46948820  | maverick [similar to <i>Anopheles gambiae</i> ]                           | 2205.03 | 14%            | 0.05     | TGFβlike domain                                                     |
| 3    | gil159032230 | zinc finger protein 294 [similar to <i>Anopheles gambiae</i> ]            | 3058.42 | 14%            | 0.03     | No conserved domain                                                 |
| 4    | gil148616061 | transposase [similar to <i>Anopheles gambiae</i> ]                        | 2471.09 | 14%            | 0.002    | Zinc finger domain                                                  |
| 5    | gil90654898  | short neuropeptide F prepropeptide [similar to <i>Anopheles gambiae</i> ] | 3491.73 | 13%            | 0.049    | No conserved domain                                                 |
| 6    | gil3170241   | TU37B2 [similar to <i>Anopheles gambiae</i> ]                             | 2886.33 | 13%            | 0.005    | Integral membrane protein                                           |
| 7    | gil15485212  | calpain [similar to <i>Anopheles gambiae</i> ]                            | 2763.78 | 12%            | 0.01     | Cysteine proteinases , calpain domain                               |
| 8    | gil145559280 | CTLMA2 [similar to <i>Anopheles gambiae</i> ]                             | 1988.89 | 11%            | 0.04     | Ctype lectin                                                        |
| 9    | gil4099803   | Tc1-like transposase [similar to <i>Anopheles gambiae</i> ]               | 3921.89 | 10%            | 0.02     | Transposase domain                                                  |
| 10   | gil77415700  | hypothetical protein [similar to <i>Anopheles gambiae</i> ]               | 1939.92 | 10%            | 0.03     | Insect pheromone binding family                                     |
| 11   | gil37962892  | ICHIT [similar to <i>Anopheles gambiae</i> ]                              | 3580.8  | 10%            | 0.055    | Chitin binding domain                                               |
| 12   | gil119393795 | Rab5 [similar to <i>Anopheles gambiae</i> ]                               | 2223.13 | 10%            | 0.008    | Rab related GTPase family, nucleotide Po <sub>4</sub> bindind motif |
| 13   | gil37703102  | FBN23 [similar to <i>Anopheles gambiae</i> ]                              | 3325.7  | 10%            | 4.94E-05 | No conserved domain                                                 |
| 14   | gil40792589  | superoxide dismutase 1 [similar to <i>Anopheles gambiae</i> ]             | 2212.16 | 9%             | 0.04     | Fe-Mn superoxide dismutase                                          |

|    |              |                                                                                                |         |    |        |                               |
|----|--------------|------------------------------------------------------------------------------------------------|---------|----|--------|-------------------------------|
| 15 | gil62528997  | CAPA-like receptor [similar to <i>Anopheles gambiae</i> ]                                      | 4301.27 | 9% | 0.003  | No conserved domain           |
| 16 | gil6635467   | immune-responsive serine protease-related protein ISPR9 [similar to <i>Anopheles gambiae</i> ] | 1754.84 | 9% | 0.05   | No conserved domain           |
| 17 | gil18140727  | twelve cysteine protein 1 [similar to <i>Anopheles gambiae</i> ]                               | 1622.22 | 9% | 0.007  | No conserved domain           |
| 18 | gil56067723  | alanyl-tRNA synthetase [similar to <i>Anopheles gambiae</i> ]                                  | 3093.48 | 9% | 0.0007 | tRNA synthetase               |
| 19 | gil1220128   | vacuolar ATPase [similar to <i>Anopheles gambiae</i> ]                                         | 1425.68 | 9% | 0.04   | F subunit                     |
| 20 | gil187441860 | CLIPB15 protein [similar to <i>Anopheles gambiae</i> ]                                         | 1761.77 | 9% | 0.03   | Trypsin like serine proteases |
| 21 | gil52429829  | fruitless female-specific zinc-finger C isoform [similar to <i>Anopheles gambiae</i> ]         | 5456.18 | 9% | 0.02   | No conserved domain           |
| 22 | gil224038197 | serine protease 14 [similar to <i>Anopheles gambiae</i> ]                                      | 3277.52 | 9% | 0.02   | Trypsin like serine proteases |
| 23 | gil63259109  | CYP325C2 [similar to <i>Anopheles gambiae</i> ]                                                | 2376.09 | 8% | 0.047  | Cyp x domain                  |
| 24 | gil38196173  | SRPN9 [similar to <i>Anopheles gambiae</i> ]                                                   | 2298.15 | 8% | 0.0005 | Proteinase inhibitors         |
| 25 | gil19577378  | putative translation initiation factor [similar to <i>Anopheles gambiae</i> ]                  | 3156.38 | 8% | 0.034  | Salvage domain                |
| 26 | gil28396156  | putative antennal carrier protein TOL-1 [similar to <i>Anopheles gambiae</i> ]                 | 2636.35 | 8% | 0.013  | Juvenile hormone              |
| 27 | gil38708297  | SP22D [similar to <i>Anopheles gambiae</i> ]                                                   | 2217.18 | 7% | 0.01   | Chitin binding domain         |
| 28 | gil2253393   | serine protease 14D [similar to <i>Anopheles gambiae</i> ]                                     | 2613.33 | 7% | 0.04   | Trypsin like serine protease  |
| 29 | gil56067837  | heat shock protein DnaJ [similar to <i>Anopheles gambiae</i> ]                                 | 1368.7  | 7% | 0.04   | Thioredox domain              |

|    |              |                                                                                        |         |    |       |                                                 |
|----|--------------|----------------------------------------------------------------------------------------|---------|----|-------|-------------------------------------------------|
| 30 | gil253970801 | putative Ropn11-like protein [similar to <i>Anopheles gambiae</i> ]                    | 4970.35 | 7% | 0.04  | No conserved domain                             |
| 31 | gil47606680  | G-protein coupled receptor 4 [similar to <i>Anopheles gambiae</i> ]                    | 3301.71 | 7% | 0.03  | transmembrane receptor                          |
| 32 | gil2076747   | engrailed [similar to <i>Anopheles gambiae</i> ]                                       | 3411.61 | 6% | 0.002 | No conserved domain                             |
| 33 | gil325699280 | AGAP007032-PA [similar to <i>Anopheles gambiae</i> ]                                   | 2639.15 | 6% | 0.035 | No conserved domain                             |
| 34 | gil3128484   | dopa decarboxylase isoform 2 [similar to <i>Anopheles gambiae</i> ]                    | 3316.63 | 6% | 0.06  | Pyridoxal P <sub>0</sub> <sub>4</sub> dependent |
| 35 | gil327244539 | APL1B [similar to <i>Anopheles gambiae</i> ]                                           | 3546.66 | 6% | 0.009 | Leucine rich repeat                             |
| 36 | gil14572580  | arrestin [similar to <i>Anopheles gambiae</i> ]                                        | 2245.27 | 6% | 0.004 | S antigen C like domain                         |
| 37 | gil21541544  | glutathione S-transferase 3-8 [similar to <i>Anopheles gambiae</i> ]                   | 1649.07 | 6% | 0.01  | GST domain                                      |
| 38 | gil160905682 | ACP receptor [similar to <i>Anopheles gambiae</i> ]                                    | 3301.71 | 6% | 0.03  | 7 transmembrane receptor                        |
| 39 | gil239819632 | carbonic anhydrase 4 [similar to <i>Anopheles gambiae</i> ]                            | 2457.2  | 6% | 0.016 | No conserved domain                             |
| 40 | gil577351    | putative nucleic acid binding protein [similar to <i>Anopheles gambiae</i> ]           | 2433.2  | 6% | 0.01  | No conserved domain                             |
| 41 | gil187447804 | ENSANGG00000009053 protein [similar to <i>Anopheles gambiae</i> ]                      | 1584.76 | 6% | 0.001 | No conserved domain                             |
| 42 | gil19572383  | putative glycerol kinase [similar to <i>Anopheles gambiae</i> ]                        | 2884.43 | 5% | 0.01  | Kinase,HSP70                                    |
| 43 | gil51873097  | nicotinic acetylcholine receptor subunit beta 1 [similar to <i>Anopheles gambiae</i> ] | 3427.58 | 5% | 0.002 | Neurotransmitter type domain                    |
| 44 | gil28569863  | gag-like protein [similar to <i>Anopheles gambiae</i> ]                                | 2485.18 | 5% | 0.04  | No conserved domain                             |

|    |              |                                                                                         |         |    |        |                               |
|----|--------------|-----------------------------------------------------------------------------------------|---------|----|--------|-------------------------------|
| 45 | gil17932668  | Ag9 protein [similar to <i>Anopheles gambiae</i> ]                                      | 1996.87 | 5% | 0.01   | apyrase                       |
| 46 | gil270266159 | plugin [similar to <i>Anopheles gambiae</i> ]                                           | 3331.58 | 5% | 0.024  | No conserved domain           |
| 47 | gil284928365 | CLIPB14 [similar to <i>Anopheles gambiae</i> ]                                          | 2193.06 | 5% | 0.001  | Trypsin like serine protease  |
| 48 | gil118500886 | gustatory receptor 22 [similar to <i>Anopheles gambiae</i> ]                            | 2735.31 | 5% | 0.0001 | No conserved domain           |
| 49 | gil225675537 | signal transducer and activator of transcription [similar to <i>Anopheles gambiae</i> ] | 4579.86 | 5% | 0.01   | STAT protein, $\alpha$ domain |
| 50 | gil75911308  | protein O-fucosyltransferase 1 [similar to <i>Anopheles gambiae</i> ]                   | 2446.33 | 5% | 0.001  | GDP fucose protein            |
| 51 | gil62529001  | pyrokinin-like receptor 2 [similar to <i>Anopheles gambiae</i> ]                        | 2723.4  | 4% | 0.01   | No conserved domain           |
| 52 | gil226711462 | RecName: Full=Cytoplasmic tRNA 2-thiolation protein 2 (similar to <i>An. gambiae</i> )  | 2026.97 | 4% | 0.01   | No conserved domain           |
| 53 | gil145413657 | LRIM1 [similar to <i>Anopheles gambiae</i> ]                                            | 2111.07 | 4% | 0.002  | No conserved domain           |
| 54 | gil54124667  | peroxidase 15 [similar to <i>Anopheles gambiae</i> ]                                    | 1289.6  | 4% | 0.002  | Animal heme peroxidases       |
| 55 | gil156028184 | AGAP002429-PA [similar to <i>Anopheles gambiae</i> ]                                    | 2333.27 | 4% | 0.0003 | CypX                          |
| 56 | gil3406737   | S-adenosyl-L-homocysteine hydrolase [Anopheles gambiae]                                 | 2103.76 | 4% | 0.004  | Hydrolases domain             |
| 57 | gil222160938 | putative cation proton antiporter [similar to <i>Anopheles gambiae</i> ]                | 2309.05 | 4% | 0.01   | K <sup>+</sup> transport      |
| 58 | gil46948822  | medea [similar to <i>Anopheles gambiae</i> ]                                            | 3546.68 | 4% | 0.02   | MH <sub>2</sub> domain        |
| 59 | gil19577386  | putative chitin binding protein [similar to <i>Anopheles gambiae</i> ]                  | 2310.17 | 4% | 0.008  | No conserved domain           |

|    |              |                                                                           |         |    |       |                             |
|----|--------------|---------------------------------------------------------------------------|---------|----|-------|-----------------------------|
|    |              |                                                                           |         |    |       |                             |
| 60 | gil6759388   | putative serine protease inhibitor [similar to <i>Anopheles gambiae</i> ] | 1502.76 | 3% | 0.037 | Chaperonins proteins        |
| 61 | gil62911114  | lysozyme c-6 [similar to <i>Anopheles gambiae</i> ]                       | 2801.14 | 3% | 0.009 | C type lysozyme             |
| 62 | gil732550    | Anlar [similar to <i>Anopheles gambiae</i> ]                              | 3760.79 | 3% | 0.003 | Tyrosine phosphatases       |
| 63 | gil46981770  | tryptophan transporter [similar to <i>Anopheles gambiae</i> ]             | 2361.14 | 3% | 0.005 | Sodium neurotransmitter     |
| 64 | gil332330728 | chitinase 5-3 [similar to <i>Anopheles gambiae</i> ]                      | 1524.78 | 3% | 0.012 | GH18 type II glyco18 domain |
| 65 | gil327244332 | APL1A [similar to <i>Anopheles gambiae</i> ]                              | 1735.07 | 3% | 0.005 | No conserved domain         |

\*OMSSA: Open mass spectrometry search algorithm
